# Supplementary material for: Multi-environment evaluation for downy mildew disease incidence revealed the prevalence of multiple pathotypes and the need for region-specific breeding strategies in cucumber
Source: Research Square preprint supplement (doi:10.21203/rs.3.rs-8364842/v1), 2026-02-02
Supplement: Supplementary file 1 [file 0decfdac3a19553b222924f3.xlsx]

## Sheet: Sheet1
IC527413	West Bengal	Landrace
IC523673	Uttar Pradesh	Landrace
IC527400	West Bengal	Landrace
IC541436	Others	Landrace
IC410211	Kerala	Landrace
IC354750	Jharkhand	Landrace
IC588145	Delhi	Landrace
IC572024	Lakshadweep	Landrace
IC354787	Uttar Pradesh	Landrace
IC523678	Karnataka	Landrace
IC421752	Karnataka	Landrace
IC410202	Kerala	Landrace
IC345264	Andhra Pradesh	Landrace
IC344394	Kerala	Landrace
IC523694	Jharkhand	Landrace
IC448827	Bihar	Landrace
IC523680	Karnataka	Landrace
IC344336	Kerala	Landrace
IC354806	Jharkhand	Landrace
IC410638	Tripura	Landrace
IC523681	Karnataka	Landrace
IC248283	Goa	Landrace
IC541234	Tamil Nadu	Landrace
IC410199	Kerala	Landrace
IC248274	Goa	Landrace
IC344343	Kerala	Landrace
IC354793	Bihar	Landrace
IC523693	Jharkhand	Landrace
IC344357	Kerala	Landrace
IC248258	Karnataka	Landrace
IC317485	Tamil Nadu	Landrace
IC344333	Kerala	Landrace
IC314341	Others	Landrace
IC523684	Kerala	Landrace
IC523701	Maharashtra	Landrace
IC523699	West Bengal	Landrace
IC523695	Tamil Nadu	Landrace
IC523670	Maharashtra	Landrace
IC354782	Jharkhand	Landrace
IC523685	Karnataka	Landrace
IC523675	Kerala	Landrace
IC527420	West Benga	Landrace
IC344371	Kerala	Landrace
IC527434	West Bengal	Landrace
IC354819	Jharkhand	Landrace
IC523697	Karnataka	Landrace
IC362446	Tamil Nadu	Landrace
IC317489	Tamil Nadu	Landrace
IC354801	Jharkhand	Landrace
IC354785	Jharkhand	Landrace
IC538130	Uttar Pradesh	Landrace
IC538173	Uttar Pradesh	Landrace
IC527391	West Bengal	Landrace
IC538137	Uttar Pradesh	Landrace
IC523676	Meghalaya	Landrace
IC527394	West Bengal	Landrace
IC344358	Kerala	Landrace
IC523672	Kerala	Landrace
IC324476	Kerala	Landrace
IC353325	Bihar	Landrace
IC527418	West Bengal	Landrace
IC264979	Uttarakhand	Landrace
IC588144	Delhi	Landrace
IC354796	Bihar	Landrace
Pusa Barkha	Delhi	Landrace
IC538155	Uttar Pradesh	Landrace
IC527419	West Bengal	Landrace
IC410654	Tripura	Landrace
IC525746	Telangana	Landrace
IC523671	Kerala	Landrace
IC523698	West Bengal	Landrace
IC523691	Jharkhand	Landrace
IC354749	Jharkhand	Landrace
IC588147	Delhi	Landrace
IC588146	Delhi	Landrace
IC331940	Uttar Pradesh	Landrace
IC538145	Uttar Pradesh	Landrace
IC371736	Haryana	Landrace
IC538121	Uttar Pradesh	Landrace
IC410657	Tripura	Landrace
IC538158	Uttar Pradesh	Landrace
IC523677	Karnataka	Landrace
IC523687	Jharkhand	Landrace
IC557170	Haryana	Landrace
IC421146	Tamil Nadu	Landrace
IC255441	Uttarakhand	Landrace
IC527404	West Bengal	Landrace
IC410682	Tripura	Landrace
IC371758	Uttar Pradesh	Landrace
Japanese Long Green	Madhya Pradesh	Landrace
IC335311	Andhra Pradesh	Landrace
IC523683	Himachal Pradesh	Landrace
IC527405	West Bengal	Landrace
IC523688	Jharkhand	Landrace
IC410658	Tripura	Landrace
IC354797	Uttar Pradesh	Landrace
IC527395	West Bengal	Landrace
IC538147	Uttar Pradesh	Landrace
IC354816	Jharkhand	Landrace
IC354815	Jharkhand	Landrace
EC1041438	Others	Landrace
IC331878	Uttar Pradesh	Landrace
IC527412	West Bengal	Landrace
IC527396	West Bengal	Landrace
IC371705	Haryana	Landrace
IC410617	Tripura	Landrace
IC527402	West Bengal	Landrace
IC523700	Maharashtra	Landrace
IC523689	Jharkhand	Landrace
IC527431	West Bengal	Landrace
IC371751	Uttar Pradesh	Landrace
Pusa Uday	Others	Landrace
Pusa Long Green	Delhi	Landrace
IC354828	Jharkhand	Landrace
IC354753	Jharkhand	Landrace
IC410215	Kerala	Landrace
IC264796	Uttarakhand	Landrace
IC527410	West Bengal	Landrace
IC538126	Uttar Pradesh	Landrace
IC255800	Kerala	Landrace
IC276392	Rajasthan	Landrace
IC371738	Haryana	Landrace
IC354757	Jharkhand	Landrace
IC523674	Uttar Pradesh	Landrace
IC527423	West Bengal	Landrace
IC523679	Karnataka	Landrace
IC523682	Himachal Pradesh	Landrace
IC523690	Jharkhand	Landrace
IC523692	Jharkhand	Landrace
IC354788	Jharkhand	Landrace
